# Supplementary material for: Hydrogen storage using polymer-supported organometallic dihydrogen complexes: a mechanistic study
Source: Royal Society of Chemistry journal article supplement (doi:10.1039/b703701e), 2007-01-01
Supplement: b703701e.pdf [file b703701e.pdf]

## Hydrogen storage using polymer-supported organometallic dihydrogen complexes: a mechanistic study

Andrew I. Cooper and Martyn Poliakoff

† (i) Sample preparation: PE films (250  $\mu\text{m}$  thickness) were formed by hot pressing as described previously.<sup>16</sup>  $\text{W}(\text{CO})_6$  was impregnated into the PE films by impregnating the films with *n*-pentane solutions of the organometallic at ambient temperature followed by drying under vacuum (ii) Photolytic reactions: All reactions were carried out in a high pressure cryogenic cell equipped with  $\text{CaF}_2$  view windows, as described previously.<sup>16,17</sup> Photolysis was carried out using a Philips HPK 125 W medium pressure Hg arc lamp equipped with a  $>300$  nm filter.

‡ LDPE was used in this experiment: although this is known to have alkene residues which react with  $\text{W}(\text{CO})_5$  at higher temperatures (230 K)<sup>18</sup> it seems that the mobility of the complex / polymer at 21 K is too low to allow this reaction to occur. For all other experiments Hostalen Gur PE was used which is free of alkene functionalities but which can stabilize the 16-electron  $\text{W}(\text{CO})_5$  complex at temperatures as high as 90 K, presumably by weak van der Waals interactions of the vacant ligand site with the PE chains.

16. A. I. Cooper and M. Poliakoff, *Chem. Phys. Lett.*, 1993, **212**, 611. G. I. Childs, A. I. Cooper, T. F. Nolan, M. J. Carrott, M. W. George and M. Poliakoff, *J. Am. Chem. Soc.*, 2001, **123**, 6857.

17. S. E. J. Goff, T. F. Nolan, M. W. George and M. Poliakoff, *Organometallics*, 1998, **17**, 2730.

18. M. J. Clarke, A. I. Cooper, S. M. Howdle and M. Poliakoff, *J. Am. Chem. Soc.*, 2000, **122**, 2523.
